# Supplementary material for: Validation of Nutritional Approaches to Modulate Cardiovascular and Diabetic Risk Factors in Patients with Hypertriglyceridemia or Prediabetes—The MoKaRi II Randomized Controlled Study
Source: MDPI journal article supplement (doi:10.3390/nu16091261), 2024-04-24
Supplement: s1 [file s1]

## Supplementary Materials

**Table S1.** Biochemical methods.

| Parameter                         | Instrument                                         | Reference range                              |
|-----------------------------------|----------------------------------------------------|----------------------------------------------|
|                                   | Plasma, serum                                      |                                              |
| Total cholesterol [mmol/L]*       | Cobas 8000<br>(Roche, Mannheim, Germany)           | < 5.2                                        |
| LDL cholesterol [mmol/L]*         | Cobas 8000<br>(Roche, Mannheim, Germany)           | < 3.35                                       |
| HDL cholesterol [mmol/L]*         | Cobas 8000<br>(Roche, Mannheim, Germany)           | > 1.03                                       |
| Triglycerides [mmol/L]*           | Cobas 8000<br>(Roche, Mannheim, Germany)           | < 1.7                                        |
| High-sensitivity CRP [mg/L]*      | Cobas 8000<br>(Roche, Mannheim, Germany)           | ≤ 0.3                                        |
| Blood glucose [mmol/L]*           | Cobas 8000<br>(Roche, Mannheim, Germany)           | 18 – 60 y: 4.1 – 5.9<br>60 – 90 y: 4.6 – 6.4 |
| Insulin [mU/L]*                   | Cobas 8000<br>(Roche, Mannheim, Germany)           | 3 – 25                                       |
| C-peptide [ng/mL]*                | Cobas 8000<br>(Roche, Mannheim, Germany)           | 1.1 – 4.4                                    |
| HbA1c [%]*                        | Tosoh HLC-723G11<br>(Sysmex, Norderstedt, Germany) | 4.5 – 6.1                                    |
| GGT [μmol/l*s]*                   | Cobas 8000<br>(Roche, Mannheim, Germany)           | 0.17 – 1.19                                  |
| Folic acid [ng/mL]*               | Cobas 8000<br>(Roche, Mannheim, Germany)           | No information available                     |
| Vitamin B <sub>12</sub> [pmol/L]* | Cobas 8000<br>(Roche, Mannheim, Germany)           | 197 – 7712                                   |
| Holo-Transcobalamine [pmol/L]*    | Cobas 8000<br>(Roche, Mannheim, Germany)           | > 37.52                                      |
| Vitamin B <sub>1</sub> [nmol/L]*  | HPLC (Shimadzu, Kyoto, Japan)                      | 47 – 1412                                    |
| Vitamin B <sub>6</sub> [nmol/L]*  | HPLC (Shimadzu, Kyoto, Japan)                      | 14.6 – 72.8                                  |
| Vitamin A [μmol/L]*               | HPLC (Shimadzu, Kyoto, Japan)                      | No information available                     |
| Vitamin D [nmol/L]*               | Cobas 8000<br>(Roche, Mannheim, Germany)           | > 75                                         |
| Vitamin E [μmol/L]*               | HPLC (Shimadzu, Kyoto, Japan)                      | 11.6 – 46.4                                  |
| Ferritin [μg/L]*                  | Cobas 8000<br>(Roche, Mannheim, Germany)           | Women: 13 – 150<br>Men: 30 – 400             |
| Transferrin [g/L]*                | Cobas 8000<br>(Roche, Mannheim, Germany)           | 2.0 – 3.6                                    |

Table S1. Continued.

| Parameter                            | Instrument                                    | Reference range          |
|--------------------------------------|-----------------------------------------------|--------------------------|
| Urine                                |                                               |                          |
| Calcium 24h urine [mmol/24h]*        | Cobas 8000<br>(Roche, Mannheim, Germany)      | 1.3 – 7.5                |
| Chloride 24h urine [mmol/24h]*       | Cobas 8000<br>(Roche, Mannheim, Germany)      | 110 – 250                |
| Potassium 24h urine [mmol/24h]*      | Cobas 8000<br>(Roche, Mannheim, Germany)      | 44 – 90                  |
| Creatinine 24h urine [mmol/24h]*     | Cobas 8000<br>(Roche, Mannheim, Germany)      | 8.0 – 26.5               |
| Magnesium 24h urine [mmol/24h]*      | Cobas 8000<br>(Roche, Mannheim, Germany)      | No information available |
| Sodium 24h urine [mmol/24h]*         | Cobas 8000<br>(Roche, Mannheim, Germany)      | 94 – 222                 |
| Selenium 24h urine [ $\mu$ mol/24h]* | AAS 5 FL<br>(Analytik Jena AG, Jena, Germany) | No information available |
| Zinc 24h urine [ $\mu$ mol/24h]*     | AAS 5 FL<br>(Analytik Jena AG, Jena, Germany) | No information available |
| Erythrocytes                         |                                               |                          |
| Fatty acids [% FAME] $\diamond$      | GC-17V3<br>(Shimadzu, Duisburg, Germany)      | No information available |

\* Measured by Institute of Clinical Chemistry and Laboratory Diagnostics, University Hospital Jena, Jena, Germany;  $\diamond$  Measured by Institute of Nutritional Sciences, Friedrich Schiller University, Jena, Germany. Abbreviations: C-peptide, connecting peptide; FAME, fatty acid methyl ester; GGT, gamma glutamyl transferase; HbA1c, glycated hemoglobin A<sub>1c</sub>; HDL, high-density lipoprotein; CRP, c-reactive protein; LDL, low-density lipoprotein.

**Table S2.** Daily energy and macronutrient intake of the study subjects in each group before baseline assessment (full self-reports, 5 days).

| Energy and nutrients | DGE reference values<br>51 to 64 years | HTGI<br>( <i>n</i> = 30)<br>Characteristics* | HTGC<br>( <i>n</i> = 33)<br>Characteristics* | ◇                 | PDI<br>( <i>n</i> = 30)<br>Characteristics* | PDC<br>( <i>n</i> = 31)<br>Characteristics* | ◇                 | ●                 |
|----------------------|----------------------------------------|----------------------------------------------|----------------------------------------------|-------------------|---------------------------------------------|---------------------------------------------|-------------------|-------------------|
| Energy [kcal/day]    | w: 1700<br>m: 2200                     | 2307 (± 589)                                 | 2254 (± 559)                                 | n.s. <sup>†</sup> | 2364 (± 430)                                | 2223 (± 483)                                | n.s. <sup>†</sup> | n.s. <sup>†</sup> |
| Carbohydrate [g/day] | > 50 en%                               | 217 (196, 273)                               | 213 (183, 258)                               | n.s.              | 245 (± 42)<br>246 (214, 280)                | 229 (± 61)                                  | n.s. <sup>†</sup> | n.s.              |
| Fiber [g/day]        | ≥ 30                                   | 24.4 (19.8, 31.6)                            | 21.9 (15.6, 28.4)                            | n.s.              | 27.5 (25.0, 31.1)                           | 25.3 (20.3, 31.1)                           | n.s.              | n.s.              |
| Total sugar [g/day]  | n.a.                                   | 90 (73, 125)                                 | 92 (78, 120)                                 | n.s.              | 117 (95, 128)                               | 104 (85, 120)                               | n.s.              | 0.049             |
| Sucrose [g/day]      | n.a.                                   | 45.8 (± 22.4)<br>43.2 (31.5, 56.3)           | 43.8 (30.4, 52.7)                            | n.s.              | 49.4 (± 15.2)<br>49.8 (38.2, 60.8)          | 52.2 (42.1, 61.5)                           | n.s.              | n.s. <sup>†</sup> |
| Glucose [g/day]      | n.a.                                   | 15.4 (12.2, 21.7)                            | 19.0 (14.3, 26.0)                            | n.s.              | 21.4 (± 6.6)<br>20.9 (16.4, 25.2)           | 19.6 (± 7.0)                                | n.s. <sup>†</sup> | 0.011             |
| Fructose [g/day]     | n.a.                                   | 18.9 (13.9, 25.6)                            | 24.4 (16.9, 31.0)                            | n.s.              | 27.3 (± 9.1)<br>26.6 (21.0, 31.9)           | 23.6 (± 9.4)                                | n.s. <sup>†</sup> | 0.002             |
| Alcohol [g/day]      | n.a.                                   | 1.9 (0.2, 13.5)                              | 10.9 (3.9, 23.2)                             | 0.006             | 4.7 (2.5, 10.3)                             | 3.5 (0.2, 10.9)                             | n.s.              | n.s.              |
| Protein [g/day]      | 0.8 g/kg body weight                   | 90 (± 28)<br>86 (70, 101)                    | 88 (± 22)                                    | n.s. <sup>†</sup> | 89 (79, 107)                                | 84 (68, 100)                                | n.s.              | n.s.              |
| Fat [g/day]          | 30 en%                                 | 97 (71, 120)                                 | 91 (75, 106)                                 | n.s.              | 98 (± 27)<br>96 (81, 123)                   | 93 (± 25)                                   | n.s. <sup>†</sup> | n.s.              |
| SFA [g/day]          | < 10 en%                               | 40.3 (± 13.1)                                | 36.3 (± 12.5)                                | n.s. <sup>†</sup> | 41.4 (± 13.8)                               | 37.3 (± 9.3)                                | n.s. <sup>†</sup> | n.s. <sup>†</sup> |
| MUFA [g/day]         | > 10 en%                               | 32.8 (± 10.4)<br>32.4 (24.3, 40.6)           | 31.6 (24.8, 37.5)                            | n.s.              | 34.1 (± 9.2)                                | 32.6 (± 10.2)                               | n.s. <sup>†</sup> | n.s. <sup>†</sup> |
| PUFA [g/day]         | 7-10 en%                               | 12.6 (10.4, 17.1)                            | 12.3 (10.2, 16.4)                            | n.s.              | 13.7 (11.1, 18.4)                           | 15.2 (12.0, 19.1)                           | n.s.              | n.s.              |
| C-18:2n6 [g/day]     | 2.5 en%                                | 10.3 (8.5, 13.0)                             | 10.0 (8.2, 13.7)                             | n.s.              | 10.6 (8.6, 12.8)                            | 12.3 (10.0, 15.8)                           | n.s.              | n.s.              |

Table S2. Continued.

| Energy and nutrients             | DGE reference values<br>51 to 64 years | HTGI<br>( <i>n</i> = 30)<br>Characteristics* | HTGC<br>( <i>n</i> = 33)<br>Characteristics* | ◇                 | PDI<br>( <i>n</i> = 30)<br>Characteristics* | PDC<br>( <i>n</i> = 31)<br>Characteristics* | ◇                 | ●                 |
|----------------------------------|----------------------------------------|----------------------------------------------|----------------------------------------------|-------------------|---------------------------------------------|---------------------------------------------|-------------------|-------------------|
| C-18:3n3 [g/day]                 | 0.5 en%                                | 1.5 (0.9, 2.5)                               | 1.4 (1.0, 1.9)                               | n.s.              | 1.7 (1.3, 2.2)                              | 1.7 (1.2, 2.4)                              | n.s.              | n.s.              |
| C-20:5n3 [g/day]                 | 0.25                                   | 0.1 (0.0, 0.4)                               | 0.1 (0.0, 0.4)                               | n.s.              | 0.1 (0.0, 0.4)                              | 0.1 (0.0, 0.2)                              | n.s.              | n.s.              |
| C-22:6n3 [g/day]                 |                                        | 0.2 (0.1, 0.4)                               | 0.2 (0.0, 0.4)                               | n.s.              | 0.3 (0.1, 0.5)                              | 0.2 (0.1, 0.3)                              | n.s.              | n.s.              |
| C-20:4n6 [g/day]                 | n.a.                                   | 0.2 (0.1, 0.2)                               | 0.2 (0.1, 0.3)                               | n.s.              | 0.2 (0.1, 0.3)                              | 0.2 (0.1, 0.3)                              | n.s.              | n.s.              |
| Cholesterol [mg/day]             | < 300                                  | 363 (± 162)<br>340 (253, 471)                | 380 (± 175)                                  | n.s. <sup>†</sup> | 369 (274, 510)                              | 315 (256, 414)                              | n.s.              | n.s.              |
| Vitamin A [mg/day]               | w: 0.70<br>m: 0.85                     | 0.6 (0.4, 1.1)                               | 0.5 (0.3, 0.6)                               | n.s.              | 0.6 (0.4, 1.0)                              | 0.5 (0.4, 0.8)                              | n.s.              | n.s.              |
| Vitamin B <sub>1</sub> [mg/day]  | w: 1.0<br>m: 1.2                       | 1.6 (± 0.6)                                  | 1.6 (± 0.6)                                  | n.s. <sup>†</sup> | 1.6 (± 0.4)                                 | 1.6 (± 0.6)                                 | n.s. <sup>†</sup> | n.s. <sup>†</sup> |
| Vitamin B <sub>2</sub> [mg/day]  | w: 1.0<br>m: 1.3                       | 1.6 (1.3, 2.1)                               | 1.5 (1.4, 1.9)                               | n.s.              | 1.8 (1.5, 2.1)                              | 1.6 (1.3, 2.0)                              | n.s.              | n.s.              |
| Vitamin B <sub>6</sub> [mg/day]  | w: 1.4<br>m: 1.6                       | 2.0 (± 0.7)                                  | 2.0 (± 0.6)                                  | n.s. <sup>†</sup> | 2.1 (± 0.5)                                 | 1.9 (± 0.5)                                 | n.s. <sup>†</sup> | n.s. <sup>†</sup> |
| Vitamin B <sub>12</sub> [µg/day] | 4                                      | 5.6 (3.8, 7.3)                               | 5.3 (3.6, 7.6)                               | n.s.              | 6.1 (4.5, 8.5)                              | 4.5 (3.5, 6.1)                              | n.s.              | n.s.              |
| Vitamin C [mg/day]               | w: 95<br>m: 110                        | 128 (75, 220)                                | 115 (72, 175)                                | n.s.              | 157 (126, 188)                              | 129 (106, 174)                              | n.s.              | n.s.              |
| Vitamin D [µg/day]               | 20                                     | 2.9 (1.3, 5.3)                               | 2.8 (1.8, 6.2)                               | n.s.              | 2.8 (1.7, 4.8)                              | 2.5 (1.4, 3.6)                              | n.s.              | n.s.              |
| Vitamin E [mg/day]               | w: 12<br>m: 13                         | 10.3 (8.1, 15.4)                             | 11.0 (8.8, 15.7)                             | n.s.              | 11.6 (± 3.2)<br>11.5 (9.7, 12.9)            | 12.8 (± 5.1)                                | n.s. <sup>†</sup> | n.s.              |
| Vitamin K [µg/day]               | w: 65<br>m: 80                         | 142 (95, 286)                                | 143 (82, 227)                                | n.s.              | 144 (98, 273)                               | 128 (78, 182)                               | n.s.              | n.s.              |

Table S2. Continued.

| Energy and nutrients | DGE reference values<br>51 to 64 years | HTGI<br>( <i>n</i> = 30)<br>Characteristics* | HTGC<br>( <i>n</i> = 33)<br>Characteristics* | ◇    | PDI<br>( <i>n</i> = 30)<br>Characteristics* | PDC<br>( <i>n</i> = 31)<br>Characteristics* | ◇                 | ●                 |
|----------------------|----------------------------------------|----------------------------------------------|----------------------------------------------|------|---------------------------------------------|---------------------------------------------|-------------------|-------------------|
| Calcium [mg/day]     | 1000                                   | 839 (626, 1171)                              | 816 (693, 964)                               | n.s. | 993 (676, 1157)                             | 807 (655, 1078)                             | n.s.              | n.s.              |
| Magnesium [mg/day]   | w: 300<br>m: 350                       | 373 (287, 492)                               | 373 (329, 440)                               | n.s. | 394 (341, 457)                              | 379 (324, 452)                              | n.s.              | n.s.              |
| Potassium [mg/day]   | 4000                                   | 3526 (2718, 4286)                            | 3464 (2663, 4302)                            | n.s. | 3755 (± 615)<br>3832 (3467, 4061)           | 3547 (± 1041)                               | n.s. <sup>†</sup> | n.s.              |
| Iron [mg/day]        | 10                                     | 12.8 (10.1, 16.2)                            | 12.2 (10.8, 15.9)                            | n.s. | 13.8 (± 1.8)<br>13.6 (12.4, 15.1)           | 13.6 (± 4.4)                                | n.s. <sup>†</sup> | n.s.              |
| Zinc [mg/day]        | w: 10<br>m: 16                         | 10.9 (8.3, 15.6)                             | 11.1 (9.1, 12.5)                             | n.s. | 12.5 (± 2.6)<br>12.5 (10.6, 14.5)           | 11.5 (± 2.9)                                | n.s. <sup>†</sup> | n.s.              |
| Sodium [mg/day]      | 1500                                   | 2622 (1799, 3291)                            | 2320 (1894, 2695)                            | n.s. | 2699 (2099, 3191)                           | 2354 (1984, 2745)                           | n.s.              | n.s.              |
| Chloride [mg/day]    | 2300                                   | 4128 (2831, 5140)                            | 3741 (3122, 4464)                            | n.s. | 4314 (± 1530)<br>4096 (3312, 4852)          | 3842 (± 1091)                               | n.s. <sup>†</sup> | n.s.              |
| Phosphor [mg/day]    | 700                                    | 1356 (1138, 1825)                            | 1413 (1220, 1625)                            | n.s. | 1581 (± 322)<br>1579 (1367, 1735)           | 1433 (± 427)                                | n.s. <sup>†</sup> | n.s.              |
| Iodine [µg/day]      | 180                                    | 108 (77, 128)                                | 95 (75, 137)                                 | n.s. | 118 (± 42)<br>119 (83, 147)                 | 105 (± 49)                                  | n.s. <sup>†</sup> | n.s.              |
| Copper [µg/day]      | 1000-1500                              | 2042 (± 775)<br>1878 (1510, 2356)            | 1954 (1729, 2273)                            | n.s. | 2031 (± 386)                                | 2197 (± 653)                                | n.s. <sup>†</sup> | n.s. <sup>†</sup> |
| Manganese [µg/day]   | 2000-5000                              | 4264 (3459, 5524)                            | 4328 (3484, 5421)                            | n.s. | 4960 (4096, 5809)                           | 4527 (3435, 6133)                           | n.s.              | n.s.              |

\* Variables expressed as mean (± SD) and/or as median (25<sup>th</sup>, 75<sup>th</sup> percentile) depending on the statistical test that was performed; ◇ Differences between each intervention group and their corresponding control group; ● Differences between both intervention groups; † Calculated with parametric test. Abbreviations: DGE, German Nutrition Society; en%, percent of daily energy intake; HTGC, hypertriglyceridemia control; HTGI, hypertriglyceridemia intervention; MUFA, monounsaturated fatty acids; PDC, prediabetes control; PDI, prediabetes intervention; PUFA, polyunsaturated fatty acids; SFA, saturated fatty acids.

**Table S3.** Nutrient status in blood at baseline, after the intervention period and at follow-up.

| Parameters                           | Week | HTGI     |                                      |     | HTGC     |                                        |                | ◇                 | PDI      |                                        |     | PDC      |                                         |     | ◇                  | ●                  |
|--------------------------------------|------|----------|--------------------------------------|-----|----------|----------------------------------------|----------------|-------------------|----------|----------------------------------------|-----|----------|-----------------------------------------|-----|--------------------|--------------------|
|                                      |      | <i>n</i> | Characteristics*                     | Δ   | <i>n</i> | Characteristics*                       | Δ              |                   | <i>n</i> | Characteristics*                       | Δ   | <i>n</i> | Characteristics*                        | Δ   |                    |                    |
| Folic acid<br>[ng/mL]                | 0    |          | 9.5 (7.3, 13.3)                      | a   |          | 10.0 (6.3, 13.3)                       | a              | n.s.              |          | 7.8 (6.2, 9.7)                         | a   |          | 9.5 (6.0, 11.7)                         | a   | n.s.               | 0.049              |
|                                      | 10   | 29       | 9.7 (7.1, 11.5)                      | a   | 33       | 8.5 (6.1, 13.4)                        | a              | n.s.              | 30       | 9.0 (7.3, 10.5)                        | b   | 29       | 7.4 (5.5, 11.5)                         | a   | n.s.               | n.s.               |
|                                      | 20   |          | 10.0 (7.0, 11.6)                     | a   |          | 8.8 (5.3, 13.7)                        | a              | n.s.              |          | 8.1 (6.3, 10.9)                        | a,b |          | 9.0 (5.1, 12.2)                         | a   | n.s.               | n.s.               |
|                                      | %A→F | 29       | 2.4 (± 28.9)                         |     | 33       | -5.5 (± 23.1)                          |                | n.s. <sup>†</sup> | 30       | 19.1 (± 33.1)<br>14.6 (-0.4, 37.3)     |     | 31       | -8.5 (-23.2, 0.6)                       |     | 0.001              | 0.044 <sup>†</sup> |
|                                      | %A→G | 30       | -2.6 (± 31.8)                        |     | 33       | -6.6 (± 31.5)                          |                | n.s. <sup>†</sup> | 30       | 12.7 (± 36.1)                          |     | 29       | -5.6 (± 25.2)                           |     | 0.028 <sup>†</sup> | n.s. <sup>†</sup>  |
| Vitamin B <sub>12</sub><br>[pmol/L]  | 0    |          | 256.0 (199.0, 326.0)                 | a   |          | 269.0 (207.0, 336.0)                   | a              | n.s.              |          | 288.0 (245.0, 337.5)                   | a   |          | 318.0 (269.0, 400.0)                    | a   | n.s.               | n.s.               |
|                                      | 10   | 29       | 220.0 (175.0, 284.0)                 | b   | 33       | 234.0 (184.0, 307.0)                   | b              | n.s.              | 30       | 237.5 (± 73.6)<br>229.0 (177.8, 288.5) | b   | 29       | 312.3 (± 115.3)<br>283.0 (244.0, 362.0) | b   | 0.005 <sup>†</sup> | n.s.               |
|                                      | 20   |          | 267.0 (194.0, 298.0)                 | a,b |          | 245.0 (205.0, 313.0)                   | a,b            | n.s.              |          | 236.0 (171.8, 341.5)                   | a   |          | 297.0 (253.0, 385.0)                    | a,b | n.s.               | n.s.               |
|                                      | %A→F | 29       | -9.1 (± 18.7)                        |     | 33       | -9.0 (± 12.7)                          |                | n.s. <sup>†</sup> | 30       | -16.6 (± 15.9)                         |     | 31       | -8.2 (± 15.0)                           |     | 0.036 <sup>†</sup> | n.s. <sup>†</sup>  |
|                                      | %A→G | 30       | -6.3 (-14.1, 2.0)                    |     | 33       | -5.9 (-13.0, 2.5)                      |                | n.s.              | 30       | -7.3 (-25.1, 10.7)                     |     | 29       | -4.8 (-14.7, 4.4)                       |     | n.s.               | n.s.               |
| Holo-<br>Transcobalamine<br>[pmol/L] | 0    |          | 88.6 (± 24.6)<br>85.6 (71.2, 102.0)  | a   |          | 85.0 (± 35.3)                          | a <sup>†</sup> | n.s. <sup>†</sup> |          | 89.0 (± 27.3)<br>90.2 (70.3, 99.7)     | a   |          | 91.8 (79.0, 123.0)                      | a   | n.s.               | n.s. <sup>†</sup>  |
|                                      | 10   | 29       | 85.1 (± 26.1)<br>87.6 (63.5, 97.0)   | a   | 33       | 86.3 (± 31.9)                          | a <sup>†</sup> | n.s. <sup>†</sup> | 30       | 80.9 (± 22.4)<br>78.7 (64.7, 100.2)    | a   | 29       | 92.0 (± 31.9)<br>88.5 (65.4, 117.0)     | a   | n.s. <sup>†</sup>  | n.s. <sup>†</sup>  |
|                                      | 20   |          | 80.7 (63.3, 87.4)                    | a   |          | 79.1 (± 25.8)<br>79.5 (57.1, 97.4)     | a <sup>†</sup> | n.s.              |          | 76.2 (61.6, 106.6)                     | a   |          | 91.5 (65.5, 111.0)                      | a   | n.s.               | n.s.               |
|                                      | %A→F | 29       | -2.4 (± 21.3)                        |     | 33       | 4.8 (± 19.3)                           |                | n.s. <sup>†</sup> | 30       | -6.1 (± 20.4)                          |     | 31       | -4.5 (± 18.9)                           |     | n.s. <sup>†</sup>  | n.s. <sup>†</sup>  |
|                                      | %A→G | 30       | -7.2 (-22.1, 5.7)                    |     | 33       | -8.0 (-19.6, 10.9)                     |                | n.s.              | 30       | -5.0 (-18.3, 19.7)                     |     | 29       | -9.0 (-21.4, 9.6)                       |     | n.s.               | n.s.               |
| Vitamin B <sub>1</sub><br>[nmol/L]   | 0    |          | 144.5 (134.2, 150.7)                 | a   |          | 144.9 (± 25.5)<br>142.6 (125.9, 160.3) | a <sup>†</sup> | n.s.              |          | 135.3 (120.5, 148.4)                   | a,b |          | 139.3 (126.3, 156.3)                    | a   | n.s.               | n.s.               |
|                                      | 10   | 29       | 128.6 (117.4, 138.4)                 | b   | 33       | 131.6 (± 21.4)<br>129.8 (120.3, 145.3) | b <sup>†</sup> | n.s.              | 30       | 125.8 (117.5, 143.3)                   | a   | 29       | 134.8 (115.5, 151.1)                    | a   | n.s.               | n.s.               |
|                                      | 20   |          | 150.0 (133.1, 155.6)                 | a   |          | 142.4 (± 26.1)<br>145.2 (118.2, 160.9) | a <sup>†</sup> | n.s.              |          | 145.1 (128.8, 159.8)                   | b   |          | 139.9 (124.5, 157.9)                    | a   | n.s.               | n.s.               |
|                                      | %A→F | 29       | -10.7 (± 9.8)<br>-11.9 (-15.3, -4.7) |     | 33       | -8.5 (± 10.0)                          |                | n.s. <sup>†</sup> | 30       | -8.4 (-10.6, 4.1)                      |     | 31       | -6.3 (-12.9, 4.1)                       |     | n.s.               | n.s.               |
|                                      | %A→G | 30       | 4.1 (± 17.3)                         |     | 33       | -1.0 (± 14.1)                          |                | n.s. <sup>†</sup> | 30       | 8.2 (± 18.7)                           |     | 29       | 2.3 (± 17.7)                            |     | n.s. <sup>†</sup>  | n.s. <sup>†</sup>  |

Table S3. Continued.

| Parameters                         | Week                  | HTGI |                                    |                                    | HTGC           |                                    |                   | ◇                 | n     | PDI                                |                                    |                | PDC                |                   |                   | ◇                  | ●                  |
|------------------------------------|-----------------------|------|------------------------------------|------------------------------------|----------------|------------------------------------|-------------------|-------------------|-------|------------------------------------|------------------------------------|----------------|--------------------|-------------------|-------------------|--------------------|--------------------|
|                                    |                       | n    | Characteristics*                   | Δ                                  | n              | Characteristics*                   | Δ                 |                   |       | Characteristics*                   | Δ                                  | n              | Characteristics*   | Δ                 |                   |                    |                    |
| Vitamin B <sub>6</sub><br>[nmol/L] | 0                     |      | 54.7 (44.5, 85.4)                  | a                                  |                | 48.3 (32.7, 82.5)                  | a                 | n.s.              |       | 47.9 (36.1, 65.6)                  | a                                  |                | 54.4 (42.9, 75.2)  | a                 | n.s.              | n.s.               |                    |
|                                    | 10                    | 29   | 76.1 (56.4, 94.1)                  | b                                  | 33             | 52.5 (35.6, 83.1)                  | a                 | n.s.              | 30    | 58.1 (46.1, 80.9)                  | b                                  | 29             | 63.4 (51.6, 91.9)  | b                 | n.s.              | 0.045              |                    |
|                                    | 20                    |      | 58.8 (46.2, 74.9)                  | a                                  |                | 43.8 (35.4, 82.6)                  | a                 | n.s.              |       | 49.8 (36.6, 58.3)                  | a                                  |                | 47.9 (39.5, 59.0)  | a                 | n.s.              | n.s.               |                    |
|                                    | %A→F                  | 29   | 18.8 (-12.4, 80.7)                 |                                    | 33             | 18.0 (-14.5, 49.2)                 |                   | n.s.              | 30    | 31.1 (-3.0, 60.8)                  |                                    | 31             | 13.3 (4.2, 39.1)   |                   | n.s.              | n.s.               |                    |
|                                    | %A→G                  | 30   | 11.0 (± 45.9)<br>4.7 (-14.9, 45.6) |                                    | 33             | 10.0 (± 42.4)                      |                   | n.s. <sup>†</sup> | 30    | -3.4 (-19.4, 28.1)                 |                                    | 29             | -2.8 (-35.5, 19.8) |                   | n.s.              | n.s.               |                    |
| Vitamin A<br>[μmol/L]              | 0                     |      | 2.1 (± 0.3)<br>2.1 (1.9, 2.3)      | a                                  |                | 2.0 (1.8, 2.5)                     | a                 | n.s.              |       | 2.0 (± 0.5)                        | a <sup>†</sup>                     |                | 1.8 (± 0.4)        | a <sup>†</sup>    | n.s. <sup>†</sup> | n.s. <sup>†</sup>  |                    |
|                                    | 10                    | 29   | 2.0 (± 0.4)<br>2.0 (1.8, 2.2)      | a                                  | 33             | 2.1 (± 0.4)<br>2.1 (1.8, 2.3)      | a                 | n.s. <sup>†</sup> | 30    | 1.9 (± 0.4)                        | b <sup>†</sup>                     | 29             | 1.9 (± 0.4)        | b <sup>†</sup>    | n.s. <sup>†</sup> | n.s. <sup>†</sup>  |                    |
|                                    | 20                    |      | 2.0 (1.8, 2.2)                     | a                                  |                | 2.1 (1.8, 2.4)                     | a                 | n.s.              |       | 2.0 (± 0.4)<br>2.0 (1.7, 2.2)      | a,b <sup>†</sup>                   |                | 1.9 (± 0.4)        | a,b <sup>†</sup>  | n.s. <sup>†</sup> | n.s.               |                    |
|                                    | %A→F                  | 29   | -4.9 (± 13.0)<br>-4.3 (-14.5, 4.5) |                                    | 33             | 0.9 (-5.9, 9.3)                    |                   | n.s.              | 30    | -5.4 (± 14.7)<br>-7.8 (-15.5, 2.5) |                                    | 31             | 3.9 (-2.1, 12.4)   |                   | 0.001             | n.s. <sup>†</sup>  |                    |
|                                    | %A→G                  | 30   | -1.4 (± 14.8)                      |                                    | 33             | 0.9 (± 16.6)                       |                   | n.s. <sup>†</sup> | 30    | 0.3 (± 16.5)                       |                                    | 29             | 4.4 (± 15.9)       |                   | n.s. <sup>†</sup> | n.s. <sup>†</sup>  |                    |
|                                    | Vitamin D<br>[nmol/L] | 0    |                                    | 70.6 (± 24.9)<br>68.3 (52.8, 86.6) | a <sup>†</sup> |                                    | 62.3 (43.6, 73.2) | a                 | 0.032 |                                    | 56.4 (± 16.9)<br>55.7 (47.1, 71.4) | a <sup>†</sup> |                    | 58.5 (42.7, 75.1) | a                 | n.s.               | 0.013 <sup>†</sup> |
| 10                                 |                       | 29   | 76.4 (± 21.6)                      | a <sup>†</sup>                     | 33             | 68.9 (± 14.2)<br>70.5 (62.9, 77.6) | b                 | n.s. <sup>†</sup> | 30    | 63.6 (± 16.5)<br>59.2 (53.4, 75.7) | b <sup>†</sup>                     | 29             | 67.0 (50.3, 89.9)  | b                 | n.s.              | 0.013 <sup>†</sup> |                    |
| 20                                 |                       |      | 63.7 (± 21.4)                      | b <sup>†</sup>                     |                | 57.6 (± 13.6)<br>58.9 (48.4, 66.8) | a                 | n.s. <sup>†</sup> |       | 56.6 (± 17.5)<br>56.3 (44.9, 64.1) | a <sup>†</sup>                     |                | 53.2 (40.4, 67.9)  | a                 | n.s.              | n.s. <sup>†</sup>  |                    |
| %A→F                               |                       | 29   | 13.1 (± 22.9)<br>9.8 (-1.4, 26.6)  |                                    | 33             | 19.3 (± 24.8)                      |                   | n.s. <sup>†</sup> | 30    | 15.1 (-1.8, 29.4)                  |                                    | 31             | 15.4 (3.2, 33.9)   |                   | n.s.              | n.s.               |                    |
| %A→G                               |                       | 30   | -14.9 (-19.9, 3.8)                 |                                    | 33             | -3.2 (-13.7, 9.2)                  |                   | n.s.              | 30    | 1.8 (± 19.2)<br>-1.2 (-11.3, 15.8) |                                    | 29             | -2.6 (± 16.1)      |                   | n.s. <sup>†</sup> | 0.027              |                    |





Table S3. Continued.

| Parameters                 | Week             | HTGI |                   |   | HTGC |                    |   | ◇                 | n  | PDI               |   |    | PDC                |   |                   | ●                 |
|----------------------------|------------------|------|-------------------|---|------|--------------------|---|-------------------|----|-------------------|---|----|--------------------|---|-------------------|-------------------|
|                            |                  | n    | Characteristics*  | Δ | n    | Characteristics*   | Δ |                   |    | Characteristics*  | Δ | n  | Characteristics*   | Δ | ◇                 |                   |
| Transferrin saturation [%] | 0                |      | 24.6 (20.1, 28.7) | a |      | 22.4 (19.5, 27.6)  | a | n.s.              |    | 24.6 (19.9, 29.1) | a |    | 30.3 (26.0, 33.3)  | a | 0.020             | n.s.              |
|                            | 10               | 29   | 21.1 (19.4, 26.4) | a | 27   | 27.1 (21.7, 34.6)  | a | n.s.              | 29 | 23.9 (19.1, 25.6) | a | 28 | 26.4 (22.4, 33.6)  | a | 0.043             | n.s.              |
|                            | 20               |      | 24.5 (19.5, 34.0) | a |      | 24.0 (20.0, 29.1)  | a | n.s.              |    | 26.0 (22.2, 29.4) | a |    | 26.2 (22.5, 30.2)  | a | n.s.              | n.s.              |
|                            | % <sup>A→F</sup> | 29   | -2.8 (± 33.6)     |   | 33   | -0.0 (-15.5, 42.3) |   | n.s.              | 29 | 1.7 (± 29.3)      |   | 31 | 0.5 (± 28.8)       |   | n.s. <sup>†</sup> | n.s. <sup>†</sup> |
|                            | % <sup>A→G</sup> | 30   | 8.2 (± 35.7)      |   | 33   | 0.2 (± 30.9)       |   | n.s. <sup>†</sup> | 29 | 4.3 (-8.3, 16.4)  |   | 29 | -10.7 (-23.2, 2.8) |   | n.s.              | n.s.              |
|                            |                  |      | 8.3 (-18.2, 22.2) |   |      |                    |   |                   |    |                   |   |    |                    |   |                   |                   |

\* Variables expressed as mean (± SD) and/or as median (25<sup>th</sup>, 75<sup>th</sup> percentile) depending on the statistical test that was performed; Δ Differences within groups comparing points in time, points in time without a common letter are significantly different,  $p < 0.05$ ; ◇ Differences between each intervention group and their corresponding control group; ● Differences between both intervention groups; %<sup>A→F</sup>, percentage change from baseline to week 10; %<sup>A→G</sup>, percentage change from baseline to follow-up; † Calculated with parametric test. Abbreviations: HTGC, hypertriglyceridemia control; HTGI, hypertriglyceridemia intervention; PDC, prediabetes control; PDI, prediabetes intervention.



Table S4. Continued.

| Parameters                           | Week             | n  | HTGI<br>Characteristics*             | Δ   | n  | HTGC<br>Characteristics*               | Δ              | ◇                  | n  | PDI<br>Characteristics*                | Δ | n  | PDC<br>Characteristics*               | Δ              | ◇                 | ●                  |
|--------------------------------------|------------------|----|--------------------------------------|-----|----|----------------------------------------|----------------|--------------------|----|----------------------------------------|---|----|---------------------------------------|----------------|-------------------|--------------------|
| Creatinine 24h urine<br>[mmol/24h]   | 0                |    | 10.7 (8.6, 12.5)                     | a   |    | 10.1 (8.6, 12.0)                       | a              | n.s.               |    | 10.1 (8.9, 12.7)                       | a |    | 10.7 (8.4, 11.8)                      | a              | n.s.              | n.s.               |
|                                      | 10               | 29 | 8.6 (7.5, 10.7)                      | b   | 31 | 10.9 (8.7, 13.2)                       | a              | 0.038              | 30 | 9.6 (8.2, 11.3)                        | a | 29 | 11.3 (8.4, 13.5)                      | a              | n.s.              | n.s.               |
|                                      | 20               |    | 9.0 (7.3, 11.5)                      | a,b |    | 11.0 (8.7, 13.0)                       | a              | n.s.               |    | 10.2 (8.9, 11.4)                       | a |    | 10.4 (8.2, 13.9)                      | a              | n.s.              | n.s.               |
|                                      | % <sup>A→F</sup> | 29 | -11.5 (± 23.6)                       |     | 33 | 2.0 (± 28.4)                           |                | 0.047 <sup>+</sup> | 30 | -4.9 (± 16.5)<br>-7.7 (-12.3, 6.4)     |   | 31 | 1.1 (-12.8, 13.8)                     |                | n.s.              | n.s. <sup>+</sup>  |
|                                      | % <sup>A→G</sup> | 30 | -3.5 (-20.0, 4.1)                    |     | 33 | 2.5 (-10.1, 15.3)                      |                | 0.049              | 30 | -2.3 (-13.0, 11.6)                     |   | 29 | -1.8 (-15.6, 18.6)                    |                | n.s.              | n.s.               |
| Magnesium 24h<br>urine<br>[mmol/24h] | 0                |    | 3.9 (3.2, 5.1)                       | a   |    | 4.4 (± 1.6)<br>4.1 (3.2, 5.2)          | a <sup>+</sup> | n.s.               |    | 4.1 (3.6, 5.0)                         | a |    | 4.2 (± 1.1)<br>4.3 (3.2, 4.9)         | a <sup>+</sup> | n.s.              | n.s.               |
|                                      | 10               | 29 | 3.3 (2.8, 3.9)                       | a   | 31 | 4.2 (± 1.3)<br>4.3 (3.5, 5.3)          | a <sup>+</sup> | 0.029              | 30 | 4.5 (3.9, 5.1)                         | a | 28 | 4.6 (± 1.8)<br>4.4 (3.6, 5.3)         | a <sup>+</sup> | n.s.              | 0.001              |
|                                      | 20               |    | 3.9 (3.5, 4.9)                       | a   |    | 4.6 (± 1.7)<br>4.5 (3.6, 5.2)          | a <sup>+</sup> | n.s.               |    | 4.5 (3.9, 5.9)                         | a |    | 4.5 (± 1.8)<br>4.2 (3.4, 5.6)         | a <sup>+</sup> | n.s.              | n.s.               |
|                                      | % <sup>A→F</sup> | 29 | -10.6 (± 31.2)<br>-8.3 (-34.1, 11.4) |     | 32 | -7.9 (-23.8, 17.9)                     |                | n.s.               | 30 | 12.2 (± 35.1)                          |   | 31 | 5.7 (± 30.9)                          |                | n.s. <sup>+</sup> | 0.011 <sup>+</sup> |
|                                      | % <sup>A→G</sup> | 29 | 6.3 (-23.4, 25.9)                    |     | 32 | 2.5 (-19.4, 29.3)                      |                | n.s.               | 30 | 3.3 (-12.7, 39.5)                      |   | 28 | 5.0 (-23.4, 29.9)                     |                | n.s.              | n.s.               |
| Sodium 24h urine<br>[mmol/24h]       | 0                |    | 160.0 (113.0, 232.0)                 | a   |    | 150.0 (± 42.2)<br>146.0 (114.0, 184.0) | a <sup>+</sup> | n.s.               |    | 129.0 (101.0, 164.0)                   | a |    | 130.5 (105.8, 158.0)                  | a              | n.s.              | n.s.               |
|                                      | 10               | 29 | 136.0 (99.0, 155.0)                  | a   | 31 | 145.5 (± 53.0)<br>132.0 (109.0, 185.0) | a <sup>+</sup> | n.s.               | 29 | 152.6 (± 76.8)<br>135.0 (100.0, 196.0) | a | 28 | 129.6 (± 55.7)<br>130.0 (89.5, 163.5) | a              | n.s. <sup>+</sup> | n.s.               |
|                                      | 20               |    | 158.0 (109.0, 221.0)                 | a   |    | 165.8 (± 71.7)<br>150.0 (113.0, 204.0) | a <sup>+</sup> | n.s.               |    | 175.0 (117.0, 199.0)                   | a |    | 139.5 (118.5, 186.5)                  | b              | n.s.              | n.s.               |
|                                      | % <sup>A→F</sup> | 29 | -28.6 (-45.6, 11.5)                  |     | 33 | -8.4 (-23.3, 22.4)                     |                | n.s.               | 30 | 17.6 (± 54.0)<br>12.8 (-19.1, 56.1)    |   | 30 | -4.0 (± 35.1)                         |                | n.s. <sup>+</sup> | 0.018              |
|                                      | % <sup>A→G</sup> | 30 | 0.4 (-14.5, 26.5)                    |     | 33 | 4.7 (-18.6, 42.1)                      |                | n.s.               | 29 | 22.8 (-12.8, 43.4)                     |   | 28 | 13.7 (-3.9, 50.7)                     |                | n.s.              | n.s.               |

Table S4. Continued.

| Parameters                       | Week             | HTGI |                     |   | HTGC |                    |   | ◇                 | n  | PDI                                 |   |    | PDC                            |     |                    | ●                  |
|----------------------------------|------------------|------|---------------------|---|------|--------------------|---|-------------------|----|-------------------------------------|---|----|--------------------------------|-----|--------------------|--------------------|
|                                  |                  | n    | Characteristics*    | Δ | n    | Characteristics*   | Δ |                   |    | Characteristics*                    | Δ | n  | Characteristics*               | Δ   | ◇                  |                    |
| Selenium 24h urine<br>[μmol/24h] | 0                |      | 0.3 (0.2, 0.4)      | a |      | 0.3 (0.2, 0.3)     | a | n.s.              |    | 0.2 (0.2, 0.3)                      | a |    | 0.3 (0.2, 0.3)                 | a,b | 0.035              | 0.004              |
|                                  | 10               | 29   | 0.2 (0.2, 0.3)      | b | 31   | 0.3 (0.2, 0.3)     | a | n.s.              | 29 | 0.2 (0.2, 0.3)                      | a | 29 | 0.3 (0.3, 0.4)                 | a   | n.s.               | n.s.               |
|                                  | 20               |      | 0.3 (0.2, 0.3)      | b |      | 0.3 (0.2, 0.4)     | a | n.s.              |    | 0.26 (0.2, 0.3)                     | a |    | 0.3 (0.2, 0.3)                 | b   | n.s.               | n.s.               |
|                                  | % <sup>A→F</sup> | 29   | -15.4 (-30.3, 2.1)  |   | 33   | 7.1 (-14.8, 27.0)  |   | 0.042             | 29 | 5.9 (-8.7, 31.3)                    |   | 31 | 3.4 (-16.6, 44.2)              |     | n.s.               | 0.016              |
|                                  | % <sup>A→G</sup> | 30   | -13.0 (-27.4, 9.7)  |   | 33   | 2.4 (-21.7, 46.2)  |   | n.s.              | 30 | 22.9 (± 48.1)<br>17.4 (-12.6, 44.8) |   | 29 | -4.7 (± 31.0)                  |     | 0.011 <sup>†</sup> | 0.015              |
| Zinc 24h urine<br>[μmol/24h]     | 0                |      | 7.6 (4.7, 12.6)     | a |      | 7.6 (5.2, 10.3)    | a | n.s.              |    | 10.3 (± 4.5)<br>10.1 (7.3, 12.2)    | a |    | 7.6 (± 2.9)<br>6.9 (5.9, 10.2) | a   | 0.010 <sup>†</sup> | n.s.               |
|                                  | 10               | 29   | 7.4 (± 4.1)         | a | 31   | 9.1 (± 4.6)        | a | n.s. <sup>†</sup> | 29 | 10.8 (± 4.4)                        | a | 29 | 7.5 (5.6, 9.8)                 | a   | 0.041              | 0.004 <sup>†</sup> |
|                                  |                  |      | 7.0 (5.2, 9.0)      |   |      | 8.8 (4.8, 11.0)    |   |                   |    | 10.6 (8.1, 13.9)                    |   |    |                                |     |                    |                    |
|                                  | 20               |      | 5.6 (3.8, 12.0)     | a |      | 9.0 (7.1, 11.2)    | a | n.s.              |    | 8.8 (7.1, 13.0)                     | a |    | 8.4 (6.7, 10.5)                | a   | n.s.               | n.s.               |
|                                  | % <sup>A→F</sup> | 29   | -25.0 (-43.9, 22.4) |   | 33   | 1.3 (-31.8, 44.7)  |   | n.s.              | 29 | -3.9 (-21.1, 25.5)                  |   | 31 | 2.2 (-17.2, 62.5)              |     | n.s.               | n.s.               |
|                                  | % <sup>A→G</sup> | 30   | -24.1 (-43.1, 34.3) |   | 33   | 11.4 (-23.8, 58.6) |   | n.s.              | 30 | -16.8 (-38.6, 27.8)                 |   | 29 | 14.7 (-14.1, 53.8)             |     | n.s.               | n.s.               |

\* Variables expressed as mean (± SD) and/or as median (25<sup>th</sup>, 75<sup>th</sup> percentile) depending on the statistical test that was performed; Δ Differences within groups comparing points in time, points in time without a common letter are significantly different, p < 0.05; ◇ Differences between each intervention group and their corresponding control group; ● Differences between both intervention groups; %<sup>A→F</sup>, percentage change from baseline to week 10; %<sup>A→G</sup>, percentage change from baseline to follow-up; † Calculated with parametric test. Abbreviations: HTGC, hypertriglyceridemia control; HTGI, hypertriglyceridemia intervention; PDC, prediabetes control; PDI, prediabetes intervention.
